# Supplementary material
Source: MDPI journal article supplement (https://www.mdpi.com/2304-6740/7/10/125)

# Supplementary Materials: Synthesis of a Half-Sandwich Hydroxidoiridium(III) Complex Bearing a Nonprotic *N*-Sulfonyldiamine Ligand and Its Transformations Triggered by the Brønsted Basicity

Shoko Kamezaki, Yoshihito Kayaki \*, Shigeki Kuwata and Takao Ikariya

## Experimental Procedures

### Synthesis of $\text{Cp}^*\text{IrCl}[\kappa^2(\text{N},\text{N})\text{-MsNCH}_2\text{CH}_2\text{N}(\text{CH}_3)_2]$ (1)

A solution of mesyl chloride (3.2 mL, 41.4 mmol) in  $\text{CH}_2\text{Cl}_2$  (50 mL) was slowly added to a stirred solution of *N,N*-dimethylethylenediamine (4.5 mL, 41.3 mmol) in  $\text{CH}_2\text{Cl}_2$  (180 mL) at 0 °C, and then stirred for 20 h at room temperature. After the addition of KO<sup>t</sup>Bu (9.3 g, 82.9 mmol), the reaction mixture was stirred for another 1 h. The resulting liquid phase was washed with 3 mL each of water and brine and dried over  $\text{Na}_2\text{SO}_4$ . The solvent was removed in vacuo and subsequent purification by Kugelrohr distillation gave *N*-mesyl-*N',N'*-dimethylethylenediamine (2.18 g, 13.1 mmol). A mixture of  $[\text{Cp}^*\text{IrCl}_2]_2$  (0.40 g, 0.51 mmol), *N*-mesyl-*N',N'*-dimethylethylenediamine (0.17 g, 1.04 mmol), and KO<sup>t</sup>Bu (0.12 g, 1.08 mmol) in  $\text{CH}_2\text{Cl}_2$  (15 mL) was stirred at room temperature for 16 h. The resulting mixture was filtered through filter paper and the filtrate was evaporated to dryness. The residue was washed with diethyl ether and dried under vacuum. Orange crystals suitable for X-ray crystallography were obtained by slow diffusion of diethyl ether into the solution in  $\text{CH}_2\text{Cl}_2$ . Isolated yield: 49% (0.263 g, 0.50 mmol).  $^1\text{H}$  NMR (300.4 MHz,  $\text{CDCl}_3 + \text{CD}_2\text{Cl}_2$ , −30 °C,  $\delta/\text{ppm}$ ): 1.50 (s, 15H;  $\text{C}_5(\text{CH}_3)_5$ ), 2.99, 3.01, 3.08 (each s, 3H;  $\text{NCH}_2\text{CH}_2\text{N}(\text{CH}_3)_2$ ), 2.93–3.12 (each m, 1H;  $\text{NCH}_2\text{CH}_2\text{N}(\text{CH}_3)_2$ ).  $^{13}\text{C}\{^1\text{H}\}$  NMR (75.6 MHz,  $\text{CDCl}_3 + \text{CD}_2\text{Cl}_2$ , rt,  $\delta/\text{ppm}$ ): 9.95 ( $\text{C}_5(\text{CH}_3)_5$ ), 42.3 ( $\text{SO}_2\text{CH}_3$ ), 49.6, 52.1, 56.0, 67.1 ( $\text{NCH}_2\text{CH}_2\text{N}(\text{CH}_3)_2$ ), 86.7 ( $\text{C}_5(\text{CH}_3)_5$ ). Anal. Calcd for  $\text{C}_{15}\text{H}_{28}\text{N}_2\text{O}_2\text{S}\text{Cp}^*\text{Ir}$ : C 34.11, H 5.34 N 5.30. Found: C 34.24, H 5.38, N 5.16.

### Synthesis of $\text{Cp}^*\text{IrOH}[\kappa^2(\text{N},\text{N})\text{-MsNCH}_2\text{CH}_2\text{N}(\text{CH}_3)_2]$ (2)

A mixture of  $\text{Cp}^*\text{IrCl}[\kappa^2(\text{N},\text{N})\text{-MsNCH}_2\text{CH}_2\text{N}(\text{CH}_3)_2]$  (0.226 g, 0.43 mmol) and KOH (0.10 g, 1.85 mmol) in THF (15 mL) containing  $\text{H}_2\text{O}$  (10  $\mu\text{L}$ , 0.56 mmol) was stirred at room temperature for 5.5 h. The resulting mixture was filtered through filter paper and the filtrate was evaporated to dryness. The residue was washed with diethyl ether and dried under vacuum. Yellow crystals suitable for X-ray crystallography were obtained by THF. Isolated yield: 42% (0.092 g, 0.18 mmol).  $^1\text{H}$  NMR (399.8 MHz,  $\text{CD}_2\text{Cl}_2$ , −70 °C,  $\delta/\text{ppm}$ ): −0.79 (br, 1H; OH), 1.46 (s, 15H;  $\text{C}_5(\text{CH}_3)_5$ ), 2.59, 2.83, 2.88 (each s, 3H;  $\text{SO}_2\text{CH}_3$ ,  $\text{NCH}_2\text{CH}_2\text{N}(\text{CH}_3)_2$ ), 2.61–3.15 (each m, 1H;  $\text{NCH}_2\text{CH}_2\text{N}(\text{CH}_3)_2$ ).  $^{13}\text{C}\{^1\text{H}\}$  NMR (100.5 MHz,  $\text{CD}_2\text{Cl}_2$ , −70 °C,  $\delta/\text{ppm}$ ): 9.58 ( $\text{C}_5(\text{CH}_3)_5$ ), 42.9 ( $\text{SO}_2\text{CH}_3$ ), 49.2, 49.4, 66.0, 83.1 ( $\text{NCH}_2\text{CH}_2\text{N}(\text{CH}_3)_2$ ), 86.6 ( $\text{C}_5(\text{CH}_3)_5$ ). Anal. Calcd for  $\text{C}_{15}\text{H}_{29}\text{N}_2\text{O}_3\text{S}\text{Ir}$ : C 35.34, H 5.73 N 5.50. Found: C 35.11, H 5.86, N 5.41.

### Synthesis of $\text{Cp}^*\text{Ir}(\text{NHCOC}_6\text{H}_5)[\kappa^2(\text{N},\text{N})\text{-MsNCH}_2\text{CH}_2\text{N}(\text{CH}_3)_2]$ (3)

A mixture of  $\text{Cp}^*\text{IrOH}[\kappa^2(\text{N},\text{N})\text{-MsNCH}_2\text{CH}_2\text{N}(\text{CH}_3)_2]$  (0.118 g, 0.23 mmol) and benzamide (0.31 mg, 0.26 mmol) in THF (5 mL) was stirred at room temperature for 1.5 h. The resulting mixture was filtered through filter paper and the filtrate was evaporated to dryness. The residue was washed with diethyl ether and dried under vacuum. Yellow crystals suitable for X-ray crystallography were obtained by slow diffusion of diethyl ether into the solution in  $\text{CH}_2\text{Cl}_2$ . Isolated yield: 36% (0.050 g, 0.082 mmol).  $^1\text{H}$  NMR (399.8 MHz,  $\text{CD}_2\text{Cl}_2$ , rt,  $\delta/\text{ppm}$ ): 1.57 (s, 15H;  $\text{C}_5(\text{CH}_3)_5$ ), 2.26, 2.87, 3.26 (each s, 3H;  $\text{SO}_2\text{CH}_3$ ,  $\text{NCH}_2\text{CH}_2\text{N}(\text{CH}_3)_2$ ), 2.89–3.44 (each m, 1H;  $\text{NCH}_2\text{CH}_2\text{N}(\text{CH}_3)_2$ ), 6.22 (br, 1H;

NHCOC<sub>6</sub>H<sub>5</sub>), 7.31–7.35 (each m, 1H; NHCOC<sub>6</sub>H<sub>5</sub>), 7.72–7.74 (each m, 1H; NHCOC<sub>6</sub>H<sub>5</sub>). <sup>13</sup>C{<sup>1</sup>H} NMR (100.5 MHz, CDCl<sub>3</sub>, rt, δ/ppm): 9.41 (C<sub>5</sub>(CH<sub>3</sub>)<sub>5</sub>), 40.5 (SO<sub>2</sub>CH<sub>3</sub>), 47.4, 49.1 (NCH<sub>2</sub>CH<sub>2</sub>N(CH<sub>3</sub>)<sub>2</sub>), 55.4, 69.0 (NCH<sub>2</sub>CH<sub>2</sub>N(CH<sub>3</sub>)<sub>2</sub>), 86.0 (C<sub>5</sub>(CH<sub>3</sub>)<sub>5</sub>), 126.9, 127.9, 128.9, 140.9 (NHCOC<sub>6</sub>H<sub>5</sub>), 171.6 (NHCOC<sub>6</sub>H<sub>5</sub>). Anal. Calcd for C<sub>22</sub>H<sub>34</sub>N<sub>3</sub>O<sub>3</sub>Si: C 43.12, H 5.59 N 6.86. Found: C 42.94, H 5.58, N 6.74.

#### Synthesis of Cp\*Ir(CH<sub>2</sub>CN)[κ<sup>2</sup>(N,N)-MsNCH<sub>2</sub>CH<sub>2</sub>N(CH<sub>3</sub>)<sub>2</sub>] (4)

A mixture of Cp\*IrOH[κ<sup>2</sup>(N,N)-MsNCH<sub>2</sub>CH<sub>2</sub>N(CH<sub>3</sub>)<sub>2</sub>] (0.204 g, 0.41 mmol) in CH<sub>3</sub>CN (3 mL) was stirred at room temperature for 3.5 h. The resulting mixture was filtered through filter paper and the filtrate was evaporated to dryness. The residue was washed with diethyl ether and dried under vacuum. Yellow crystals were obtained by slow diffusion of diethyl ether into the solution in CH<sub>2</sub>Cl<sub>2</sub>. Isolated yield: 70% (0.152 g, 0.29 mmol). <sup>1</sup>H NMR (399.8 MHz, CD<sub>2</sub>Cl<sub>2</sub>, rt, δ/ppm): 1.57 (s, 15H; C<sub>5</sub>(CH<sub>3</sub>)<sub>5</sub>), 2.14 (d, <sup>2</sup>J<sub>HH</sub> = 64 Hz, 1H; CH<sub>2</sub>CN), 2.14 (d, <sup>2</sup>J<sub>HH</sub> = 33 Hz, 1H; CH<sub>2</sub>CN) 2.50–3.30 (each m, 1H; NCH<sub>2</sub>CH<sub>2</sub>N(CH<sub>3</sub>)<sub>2</sub>). <sup>13</sup>C{<sup>1</sup>H} NMR (100.5 MHz, CDCl<sub>3</sub>, rt, δ/ppm): −18.8(CH<sub>2</sub>CN), 9.10 (C<sub>5</sub>(CH<sub>3</sub>)<sub>5</sub>), 41.4 (SO<sub>2</sub>CH<sub>3</sub>), 49.2, 51.6, 57.4, 69.6 (NCH<sub>2</sub>CH<sub>2</sub>N(CH<sub>3</sub>)<sub>2</sub>), 87.0 (C<sub>5</sub>(CH<sub>3</sub>)<sub>5</sub>), 129.7 (CH<sub>2</sub>CN). IR (cm<sup>−1</sup>, KBr): 2187 (s), 1636 (w), 1458 (m), 1382 (s), 1316 (s), 1267(s), 1167 (w), 1115 (s), 1011 (w), 969 (w), 933 (w), 880 (w), 797 (w), 746 (w). Anal. Calcd for C<sub>17</sub>H<sub>30</sub>N<sub>3</sub>O<sub>2</sub>Si: C 38.33, H 5.68 N 7.89. Found: C 37.99, H 5.70, N 7.57.

#### Synthesis of Cp\*IrH[κ<sup>2</sup>(N,N)-MsNCH<sub>2</sub>CH<sub>2</sub>N(CH<sub>3</sub>)<sub>2</sub>] (5)

A mixture of Cp\*IrOH[κ<sup>2</sup>(N,N)-MsNCH<sub>2</sub>CH<sub>2</sub>N(CH<sub>3</sub>)<sub>2</sub>] (0.092 g, 0.18 mmol) in 2-propanol (4 mL) was stirred at room temperature for 12 h. The resulting mixture was evaporated to dryness. The residue was washed with diethyl ether and dried under vacuum. Isolated yield: 99% (0.088 g, 0.18 mmol). <sup>1</sup>H NMR (399.8 MHz, CD<sub>2</sub>Cl<sub>2</sub>, rt, δ/ppm): −11.56 (s, 1H; H), 1.72 (s, 15H; C<sub>5</sub>(CH<sub>3</sub>)<sub>5</sub>), 2.60, 2.97, 3.07 (each s, 3H; SO<sub>2</sub>CH<sub>3</sub>, NCH<sub>2</sub>CH<sub>2</sub>N(CH<sub>3</sub>)<sub>2</sub>), 2.40–3.14 (each m, 1H; NCH<sub>2</sub>CH<sub>2</sub>N(CH<sub>3</sub>)<sub>2</sub>). <sup>13</sup>C{<sup>1</sup>H} NMR (100.5 MHz, CD<sub>2</sub>Cl<sub>2</sub>, rt, δ/ppm): 10.3 (C<sub>5</sub>(CH<sub>3</sub>)<sub>5</sub>), 35.0, 51.9, 56.5, 61.6, 71.5 (SO<sub>2</sub>CH<sub>3</sub>, NCH<sub>2</sub>CH<sub>2</sub>N(CH<sub>3</sub>)<sub>2</sub>), 86.8 (C<sub>5</sub>(CH<sub>3</sub>)<sub>5</sub>). IR (cm<sup>−1</sup>, KBr): 2060 (s), 1455 (m), 1377 (w), 1327 (w), 1303 (w), 1277 (s), 1256 (m), 1183 (w), 1171 (w), 1122 (s), 1084 (w), 1017 (w), 1001 (s), 979 (s), 944 (m), 834 (m), 774 (m), 738 (m). Anal. Calcd for C<sub>15</sub>H<sub>29</sub>N<sub>2</sub>O<sub>2</sub>Si: C 36.50, H 5.92 N 5.67. Found: C 36.55, H 5.99, N 5.68.

#### Synthesis of Cp\*IrCN[κ<sup>2</sup>(N,N)-MsNCH<sub>2</sub>CH<sub>2</sub>N(CH<sub>3</sub>)<sub>2</sub>] (6)

A mixture of Cp\*Ir(OH)[κ<sup>2</sup>(N,N)-MsNCH<sub>2</sub>CH<sub>2</sub>N(CH<sub>3</sub>)<sub>2</sub>] (0.112 g, 0.22 mmol) and acetone cyanohydrin (19.9 μL, 0.22 mmol) in CH<sub>2</sub>Cl<sub>2</sub> (5 mL) was stirred at room temperature for 30 min. The resulting mixture was filtered through filter paper and the filtrate was evaporated to dryness. The residue was washed with diethyl ether and dried under vacuum. Yellow crystals suitable for X-ray crystallography were obtained by slow diffusion of diethyl ether into the solution in CH<sub>2</sub>Cl<sub>2</sub>. Isolated yield: 100% (0.111 g, 0.22 mmol). <sup>1</sup>H NMR (399.8 MHz, CD<sub>2</sub>Cl<sub>2</sub>, rt, δ/ppm): 1.68 (s, 15H; C<sub>5</sub>(CH<sub>3</sub>)<sub>5</sub>), 2.88, 3.00, 3.11 (each s, 3H; SO<sub>2</sub>CH<sub>3</sub>, NCH<sub>2</sub>CH<sub>2</sub>(CH<sub>3</sub>)<sub>2</sub>), 2.95–3.14 (each m, 1H; NCH<sub>2</sub>CH<sub>2</sub>(CH<sub>3</sub>)<sub>2</sub>). <sup>13</sup>C{<sup>1</sup>H} NMR (100.5 MHz, CD<sub>2</sub>Cl<sub>2</sub>, rt, δ/ppm): 9.69 (C<sub>5</sub>(CH<sub>3</sub>)<sub>5</sub>), 38.5 (SO<sub>2</sub>CH<sub>3</sub>), 50.5, 56.2 (NCH<sub>2</sub>CH<sub>2</sub>N(CH<sub>3</sub>)<sub>2</sub>), 70.4, 91.5 (NCH<sub>2</sub>CH<sub>2</sub>N(CH<sub>3</sub>)<sub>2</sub>), 121.3 (CN). IR (cm<sup>−1</sup>, KBr): 2103 (s), 1269 (m), 1381 (w), 1320 (w), 1287 (s), 1256 (m), 1173 (m), 1130 (s), 1081 (m), 1034 (w), 986 (s), 959 (w), 935 (w), 855 (s), 780 (m), 739 (m), 581 (w), 561 (w). Anal. Calcd for C<sub>16</sub>H<sub>28</sub>N<sub>3</sub>O<sub>2</sub>Si: C 37.05, H 5.43 N 8.10. Found: C 36.79, H 5.32, N 8.06.

#### Reaction Procedures for Transfer Hydrocyanation of Benzaldehyde with Acetone Cyanohydrin Catalyzed by 6

Under an argon atmosphere, acetone cyanohydrin (450 μL, 4.9 mmol) was added to a dioxane solution (1.0 mL) of benzaldehyde (0.052 g, 0.49 mmol) containing 6 (0.026 g, 0.05 mmol) and then stirred for 12 h at 30 °C. The reaction mixture was filtered through a pad of Florisil (100–200 mesh, Nacalai Tesque Inc.). The Florisil was washed with Et<sub>2</sub>O and the combined organic solution was evaporated. The mixture was dissolved in CDCl<sub>3</sub> and the yield was determined by <sup>1</sup>H NMR using 1,2,4,5-tetramethylbenzene (10.8 mg, 0.08 mmol) as an internal standard.

## X-Ray Crystallographic Data for 1, 2, 3, and 6

Table S1. Crystallographic data for 1 and 2.

|                                            | 1                                                                   | 2                                                                 |
|--------------------------------------------|---------------------------------------------------------------------|-------------------------------------------------------------------|
| Empirical Formula                          | C <sub>15</sub> H <sub>28</sub> ClIrN <sub>2</sub> O <sub>2</sub> S | C <sub>15</sub> H <sub>29</sub> IrN <sub>2</sub> O <sub>3</sub> S |
| Formula Weight                             | 528.13                                                              | 509.69                                                            |
| Crystal Color, Habit                       | orange, block                                                       | yellow, prism                                                     |
| Crystal System                             | orthorhombic                                                        | monoclinic                                                        |
| Space Group                                | P2 <sub>1</sub> 2 <sub>1</sub> 2 <sub>1</sub> (#19)                 | P2 <sub>1</sub> /n (#14)                                          |
| Lattice Parameters                         | <i>a</i> = 8.8643(9) Å                                              | <i>a</i> = 8.776(3) Å                                             |
|                                            | <i>b</i> = 13.6959(15) Å                                            | <i>b</i> = 15.179(6) Å                                            |
|                                            | <i>c</i> = 14.0454(12) Å                                            | <i>c</i> = 13.383(5) Å                                            |
|                                            | <i>V</i> = 1814.4(3) Å <sup>3</sup>                                 | <i>V</i> = 1782.1(11) Å <sup>3</sup>                              |
| Z value                                    | 4                                                                   | 4                                                                 |
| <i>D</i> <sub>calc</sub>                   | 1.933 g/cm <sup>3</sup>                                             | 1.900 g/cm <sup>3</sup>                                           |
| <i>F</i> <sub>000</sub>                    | 1032.00                                                             | 1000.00                                                           |
| (MoKα)                                     | 76.488 cm <sup>−1</sup>                                             | 76.430 cm <sup>−1</sup>                                           |
| Exposure Rate                              | 4.0 sec./°                                                          | 10.0 sec./°                                                       |
| No. of Reflections Measured                | 13342                                                               | 13621                                                             |
| No. of Unique Reflections                  | 3967                                                                | 4043                                                              |
| No. Variables                              | 199                                                                 | 203                                                               |
| <i>R</i> 1 ( <i>I</i> > 2.00σ( <i>I</i> )) | 0.0160                                                              | 0.0384                                                            |
| <i>wR</i> 2 (All Reflections)              | 0.0394                                                              | 0.0790                                                            |
| GOF on <i>F</i> <sup>2</sup>               | 0.864                                                               | 1.158                                                             |
| Flack Parameter                            | −0.005(4)                                                           |                                                                   |

$$R1 = \sum ||F_o| - |F_c|| / \sum |F_o|, wR2 = [ \sum (w(F_o^2 - F_c^2)^2) / \sum w(F_o^2)^2 ]^{1/2}.$$

Table S2. Crystallographic data for 3 and 6.

|                                            | 3                                                                 | 6                                                                 |
|--------------------------------------------|-------------------------------------------------------------------|-------------------------------------------------------------------|
| Empirical Formula                          | C <sub>22</sub> H <sub>34</sub> IrN <sub>3</sub> O <sub>3</sub> S | C <sub>16</sub> H <sub>28</sub> IrN <sub>3</sub> O <sub>2</sub> S |
| Formula Weight                             | 612.81                                                            | 518.70                                                            |
| Crystal Color, Habit                       | yellow, prism                                                     | yellow, platelet                                                  |
| Crystal System                             | orthorhombic                                                      | monoclinic                                                        |
| Space Group                                | P2 <sub>1</sub> 2 <sub>1</sub> 2 <sub>1</sub> (#19)               | C2 (#5)                                                           |
| Lattice Parameters                         | <i>a</i> = 8.5166(8) Å                                            | <i>a</i> = 15.158(5) Å                                            |
|                                            | <i>b</i> = 15.794(2) Å                                            | <i>b</i> = 8.800(3) Å                                             |
|                                            | <i>c</i> = 17.528(2) Å                                            | <i>c</i> = 14.210(5) Å                                            |
|                                            | <i>V</i> = 2357.7(5) Å <sup>3</sup>                               | <i>V</i> = 6470.7(12) Å <sup>3</sup>                              |
| Z value                                    | 4                                                                 | 4                                                                 |
| <i>D</i> <sub>calc</sub>                   | 1.726 g/cm <sup>3</sup>                                           | 1.858 g/cm <sup>3</sup>                                           |
| <i>F</i> <sub>000</sub>                    | 1216.00                                                           | 1016.00                                                           |
| (MoKα)                                     | 57.948 cm <sup>−1</sup>                                           | 73.450 cm <sup>−1</sup>                                           |
| Exposure Rate                              | 4.0 sec./°                                                        | 20.0 sec./°                                                       |
| No. of Reflections Measured                | 18008                                                             | 7193                                                              |
| No. of Unique Reflections                  | 5296                                                              | 4151                                                              |
| No. Variables                              | 271                                                               | 208                                                               |
| <i>R</i> 1 ( <i>I</i> > 2.00σ( <i>I</i> )) | 0.0297                                                            | 0.0333                                                            |
| <i>wR</i> 2 (All Reflections)              | 0.0730                                                            | 0.0762                                                            |
| GOF on <i>F</i> <sup>2</sup>               | 1.010                                                             | 0.973                                                             |
| Flack Parameter                            | −0.009(10)                                                        | 0.010(15)                                                         |

$$R1 = \sum ||F_o| - |F_c|| / \sum |F_o|, wR2 = [ \sum (w(F_o^2 - F_c^2)^2) / \sum w(F_o^2)^2 ]^{1/2}.$$

$^1\text{H}$  and  $^{13}\text{C}\{^1\text{H}\}$  NMR Spectra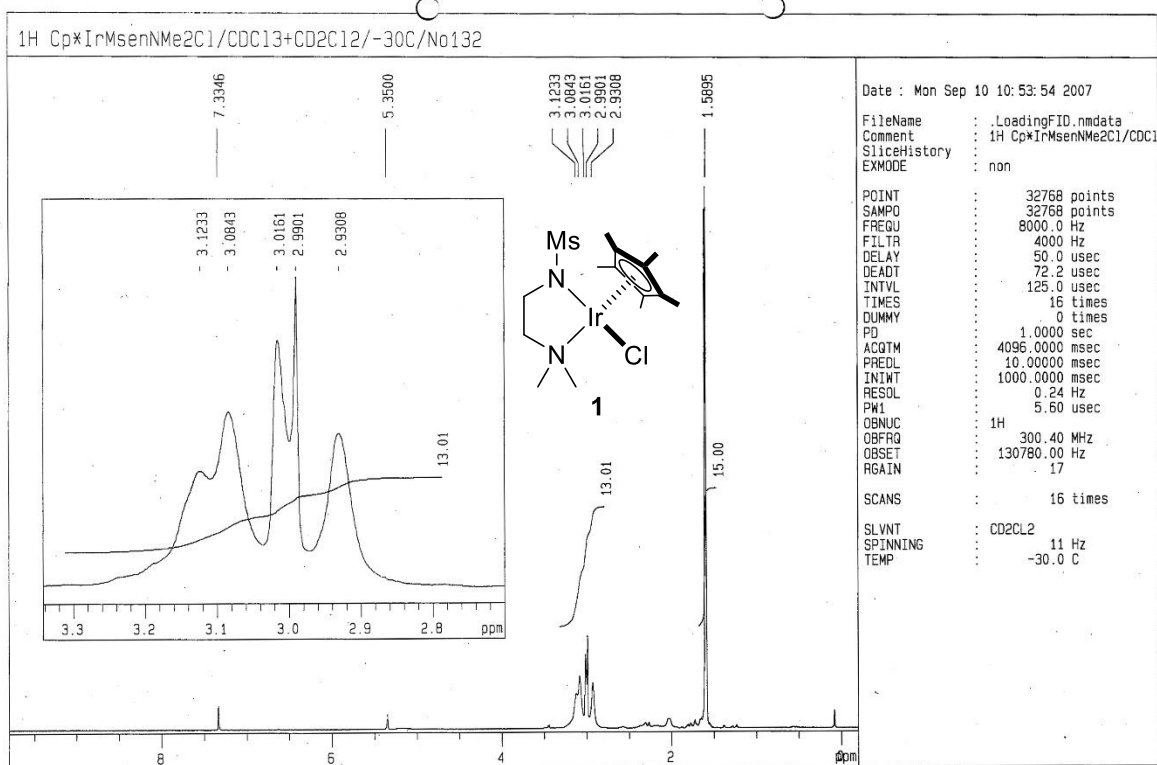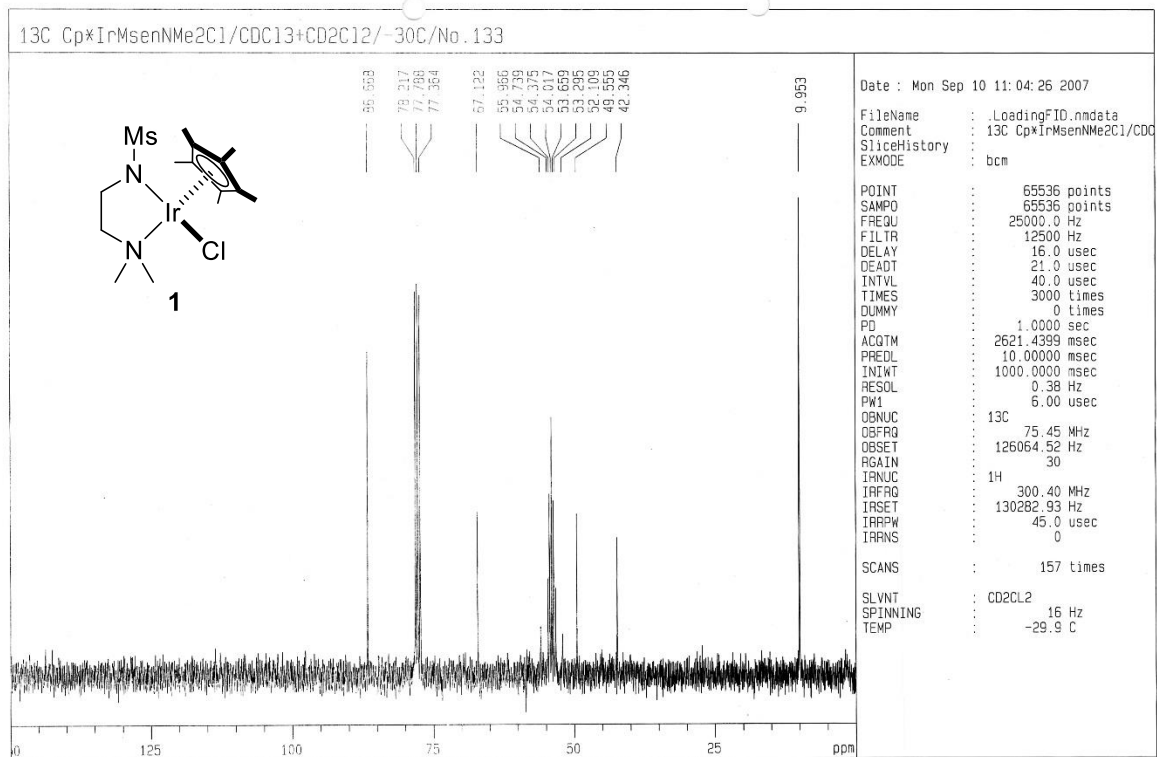

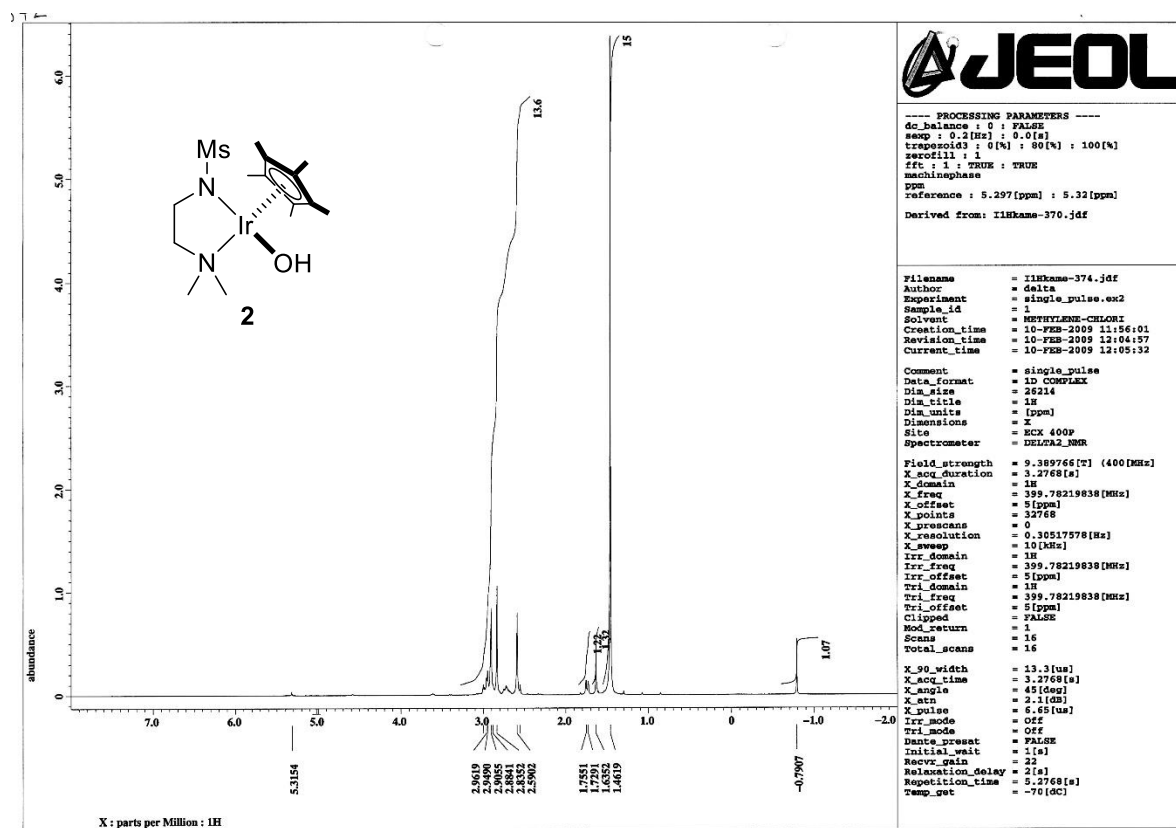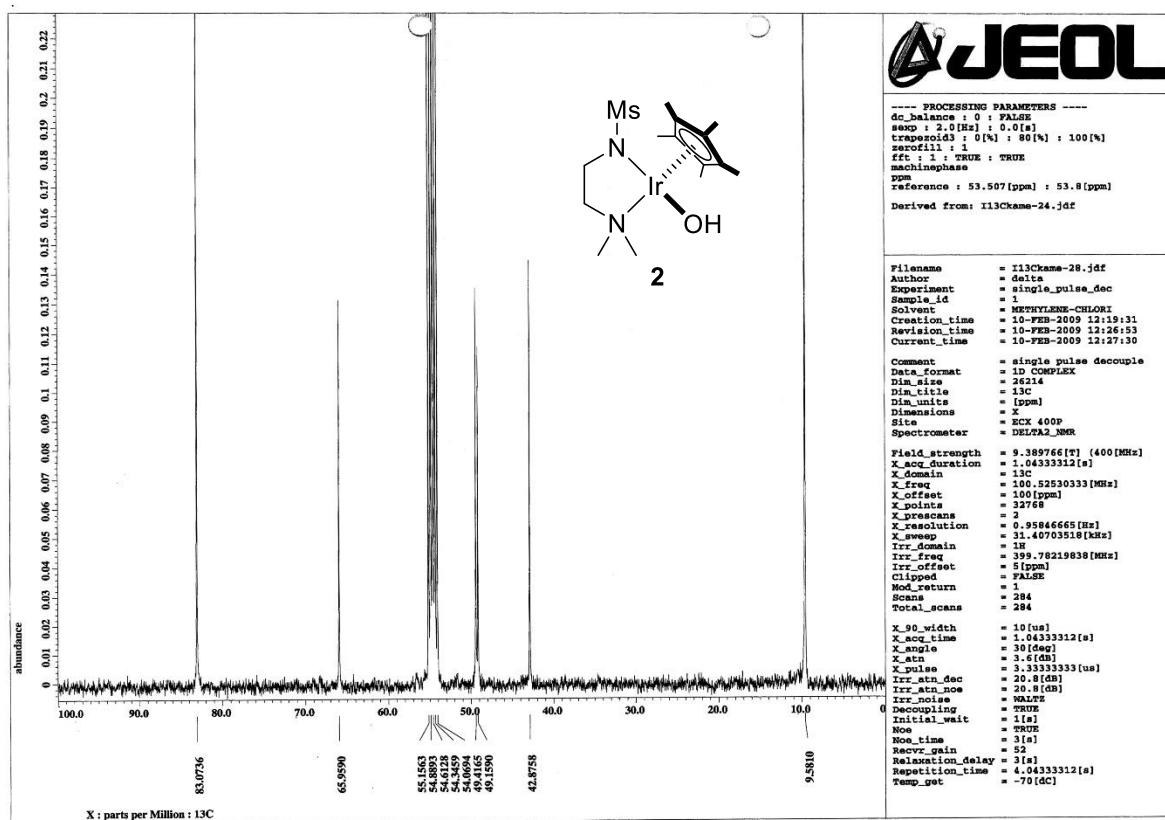

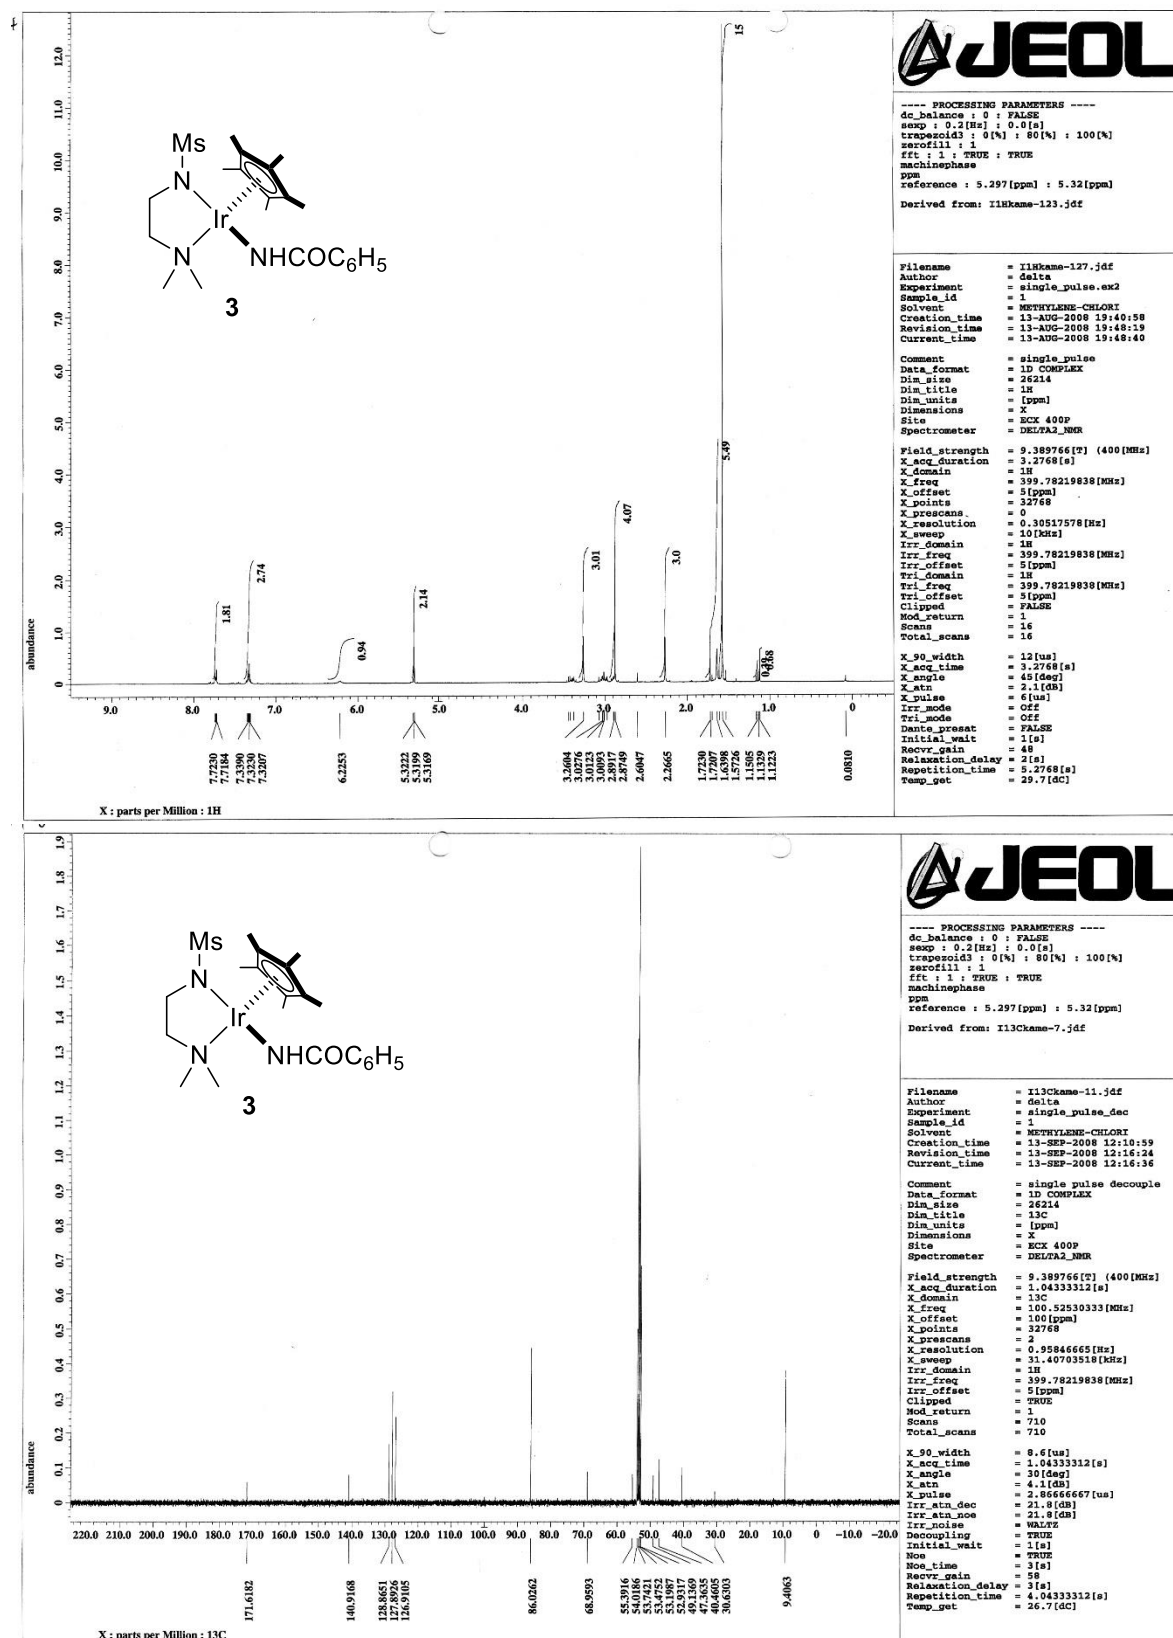

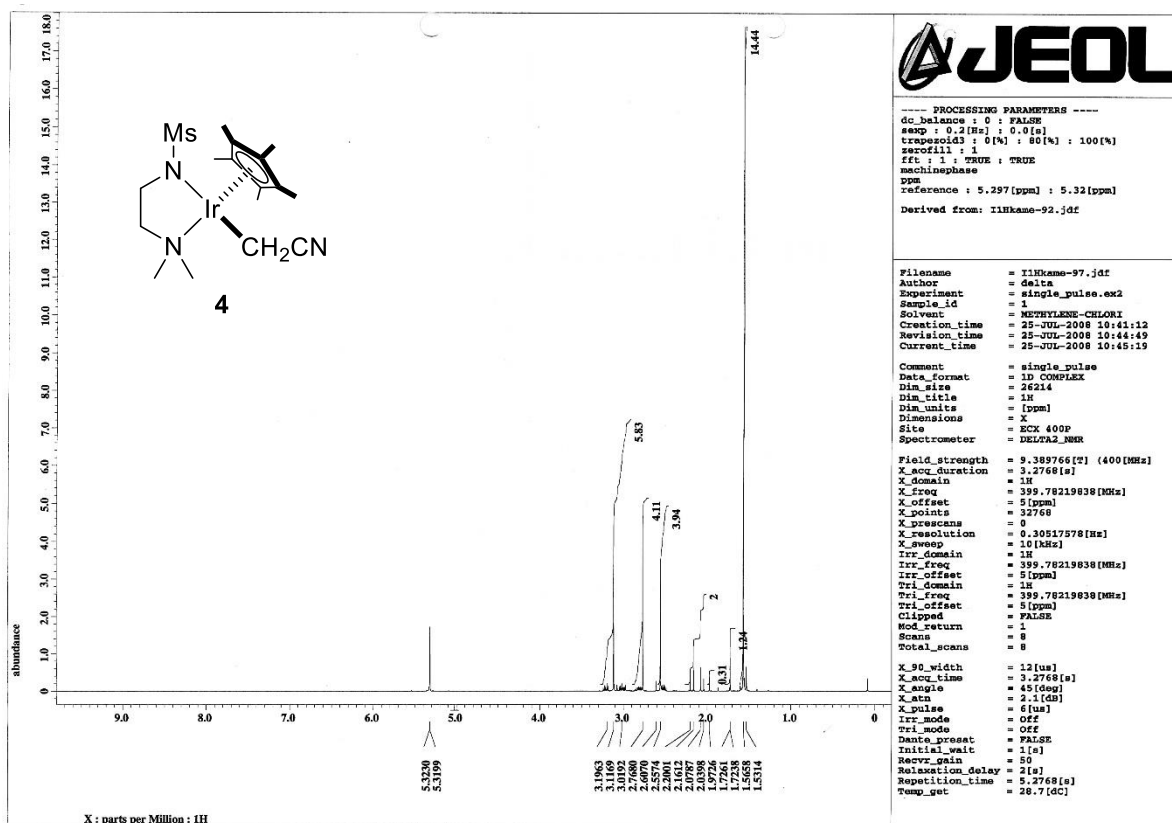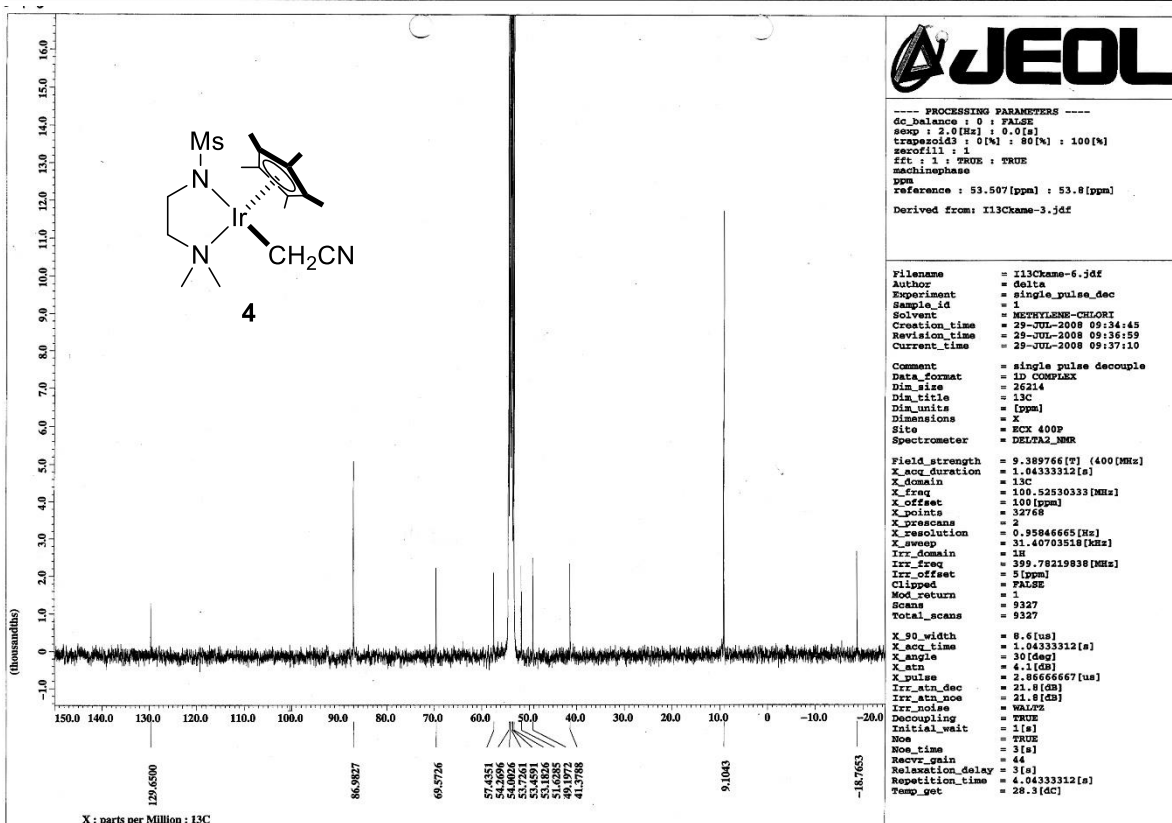

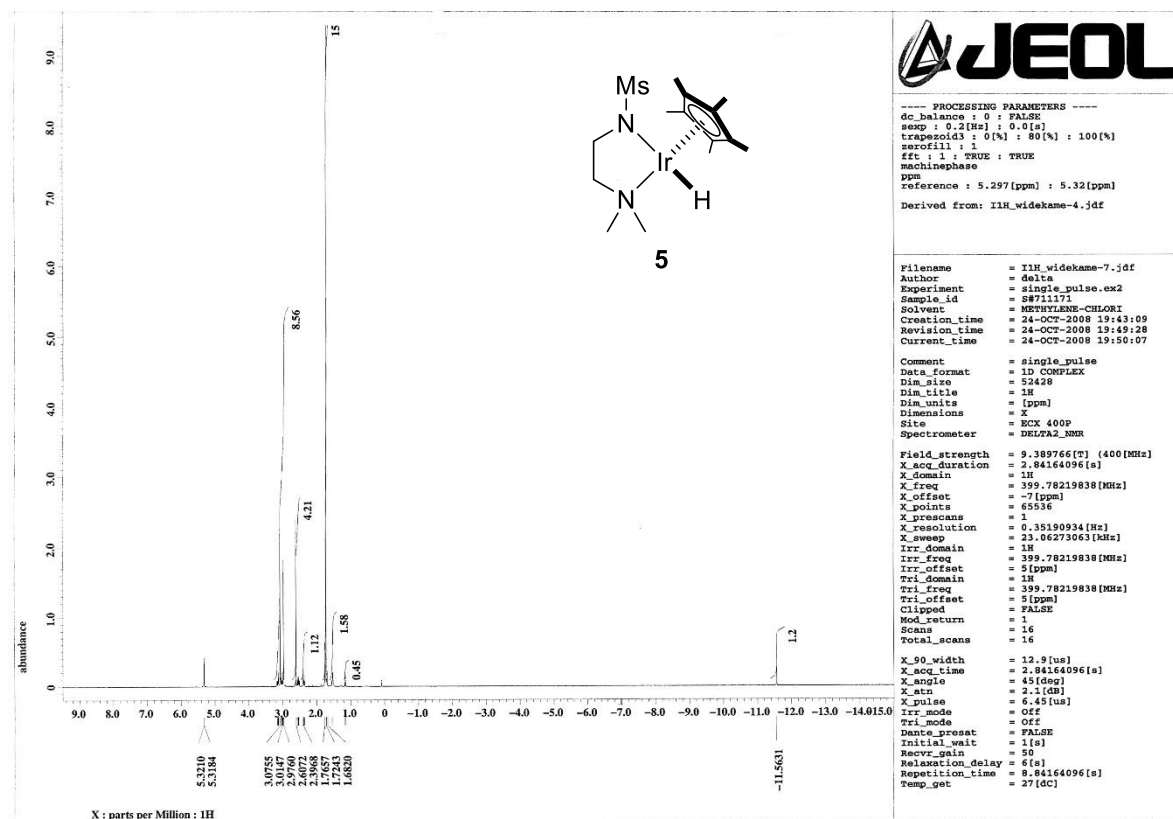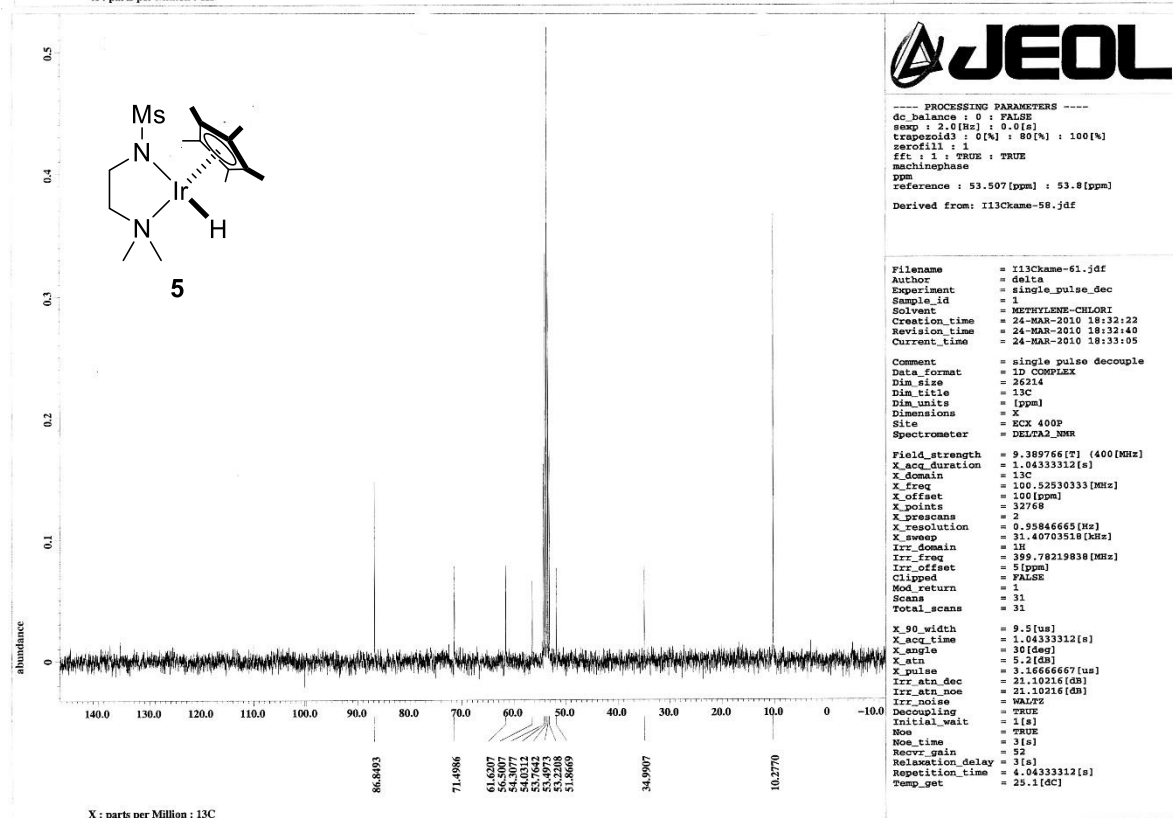



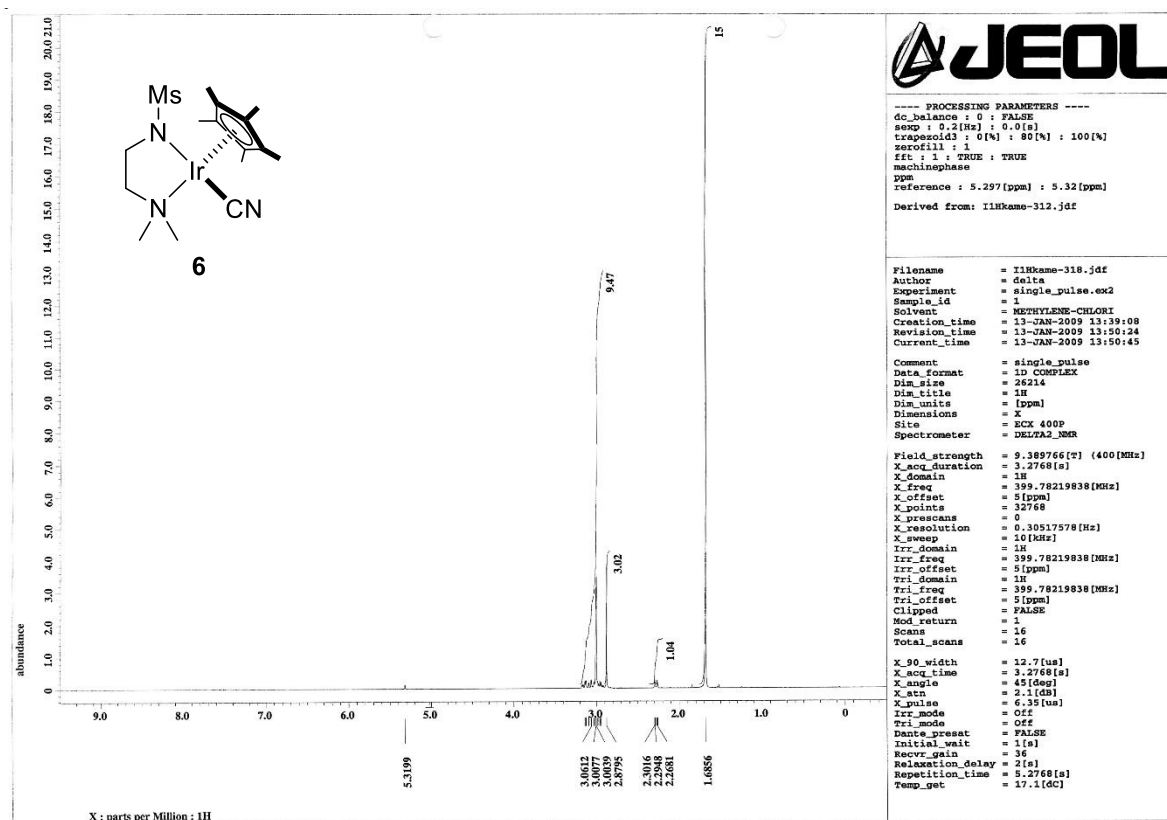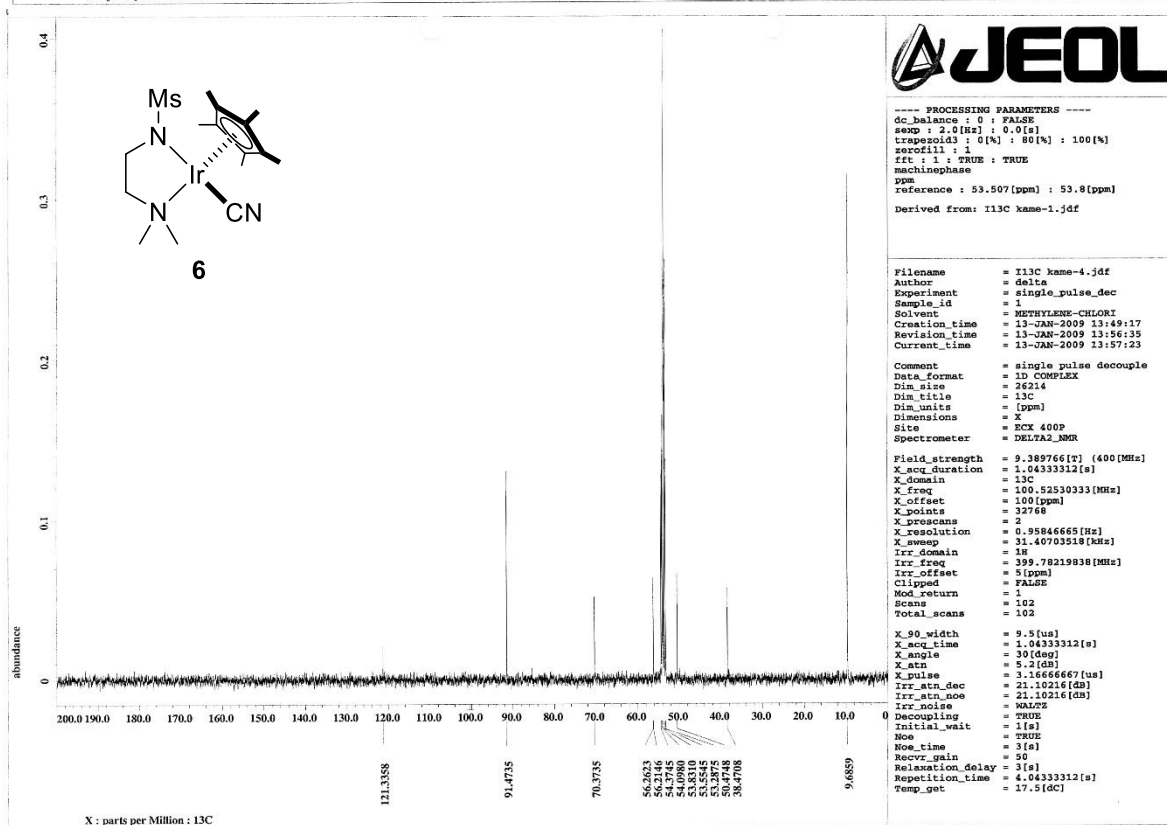

Supplement: s1 [file s1]
