# Supplementary material
Source: MDPI journal article supplement (https://www.mdpi.com/2304-6740/7/10/125)

# checkCIF/PLATON report

You have not supplied any structure factors. As a result the full set of tests cannot be run.

THIS REPORT IS FOR GUIDANCE ONLY. IF USED AS PART OF A REVIEW PROCEDURE FOR PUBLICATION, IT SHOULD NOT REPLACE THE EXPERTISE OF AN EXPERIENCED CRYSTALLOGRAPHIC REFEREE.

No syntax errors found.      CIF dictionary      Interpreting this report

## Datablock: C5Me5IrMsenDMNHCOPh

---

Bond precision:    C-C = 0.0136 A                      Wavelength=0.71075

Cell:                      a=8.5166(8)              b=15.794(2)              c=17.528(2)  
                                alpha=90              beta=90              gamma=90  
Temperature:              193 K

|                | Calculated         | Reported           |
|----------------|--------------------|--------------------|
| Volume         | 2357.7(5)          | 2357.7(5)          |
| Space group    | P 21 21 21         | P 21 21 21         |
| Hall group     | P 2ac 2ab          | P 2ac 2ab          |
| Moiety formula | C22 H34 Ir N3 O3 S | C22 H34 Ir N3 O3 S |
| Sum formula    | C22 H34 Ir N3 O3 S | C22 H34 Ir N3 O3 S |
| Mr             | 612.80             | 612.81             |
| Dx,g cm-3      | 1.726              | 1.726              |
| Z              | 4                  | 4                  |
| Mu (mm-1)      | 5.779              | 5.795              |
| F000           | 1216.0             | 1216.0             |
| F000'          | 1211.31            |                    |
| h,k,lmax       | 11,20,22           | 11,20,22           |
| Nref           | 5407[ 3061]        | 5296               |
| Tmin,Tmax      | 0.566,0.560        | 0.360,0.560        |
| Tmin'          | 0.555              |                    |

Correction method= # Reported T Limits: Tmin=0.360 Tmax=0.560  
AbsCorr = MULTI-SCAN

Data completeness= 1.73/0.98                      Theta(max)= 27.482

R(reflections)= 0.0297( 5203)                      wR2(reflections)= 0.0730( 5296)

S = 1.010                      Npar= 271

---

The following ALERTS were generated. Each ALERT has the format

**test-name\_ALERT\_alert-type\_alert-level.**

Click on the hyperlinks for more details of the test.

---

**Alert level B**

PLAT213\_ALERT\_2\_B Atom C7 has ADP max/min Ratio ..... 4.5 prolat

---

**Alert level C**

PLAT213\_ALERT\_2\_C Atom O1 has ADP max/min Ratio ..... 3.2 prolat  
PLAT213\_ALERT\_2\_C Atom C6 has ADP max/min Ratio ..... 3.7 prolat  
PLAT213\_ALERT\_2\_C Atom C8 has ADP max/min Ratio ..... 3.7 prolat  
PLAT213\_ALERT\_2\_C Atom C9 has ADP max/min Ratio ..... 3.8 prolat  
PLAT213\_ALERT\_2\_C Atom C10 has ADP max/min Ratio ..... 3.5 prolat  
PLAT213\_ALERT\_2\_C Atom C22 has ADP max/min Ratio ..... 3.1 prolat  
PLAT220\_ALERT\_2\_C Non-Solvent Resd 1 C Ueq(max)/Ueq(min) Range 5.8 Ratio  
PLAT222\_ALERT\_3\_C Non-Solv. Resd 1 H Uiso(max)/Uiso(min) Range 6.1 Ratio  
PLAT234\_ALERT\_4\_C Large Hirshfeld Difference C19 --C20 . 0.18 Ang.  
PLAT241\_ALERT\_2\_C High 'MainMol' Ueq as Compared to Neighbors of C19 Check  
PLAT242\_ALERT\_2\_C Low 'MainMol' Ueq as Compared to Neighbors of Ir1 Check  
PLAT242\_ALERT\_2\_C Low 'MainMol' Ueq as Compared to Neighbors of S1 Check  
PLAT242\_ALERT\_2\_C Low 'MainMol' Ueq as Compared to Neighbors of C1 Check  
PLAT242\_ALERT\_2\_C Low 'MainMol' Ueq as Compared to Neighbors of C3 Check  
PLAT242\_ALERT\_2\_C Low 'MainMol' Ueq as Compared to Neighbors of C4 Check  
PLAT242\_ALERT\_2\_C Low 'MainMol' Ueq as Compared to Neighbors of C5 Check  
PLAT250\_ALERT\_2\_C Large U3/U1 Ratio for Average U(i,j) Tensor .... 2.2 Note  
PLAT342\_ALERT\_3\_C Low Bond Precision on C-C Bonds ..... 0.01356 Ang.

---

**Alert level G**

CHEMS02\_ALERT\_1\_G Please check that you have entered the correct  
\_publ\_requested\_category classification of your compound;  
FI or CI or EI for inorganic; FM or CM or EM for metal-organic;  
FO or CO or EO for organic.  
From the CIF: \_publ\_requested\_category CHOOSE FI FM FO CI CM CO or A  
From the CIF: \_chemical\_formula\_sum :C22 H34 Ir1 N3 O3 S1  
PLAT007\_ALERT\_5\_G Number of Unrefined Donor-H Atoms ..... 1 Report  
PLAT019\_ALERT\_1\_G \_diffrn\_measured\_fraction\_theta\_full/\*\_max < 1.0 0.994 Report  
PLAT380\_ALERT\_4\_G Incorrectly? Oriented X(sp2)-Methyl Moiety ..... C6 Check  
PLAT380\_ALERT\_4\_G Incorrectly? Oriented X(sp2)-Methyl Moiety ..... C7 Check  
PLAT380\_ALERT\_4\_G Incorrectly? Oriented X(sp2)-Methyl Moiety ..... C8 Check  
PLAT380\_ALERT\_4\_G Incorrectly? Oriented X(sp2)-Methyl Moiety ..... C9 Check  
PLAT380\_ALERT\_4\_G Incorrectly? Oriented X(sp2)-Methyl Moiety ..... C10 Check  
PLAT963\_ALERT\_2\_G Both SHELXL WEIGHT Parameters Values Zero ..... Please Check

---

0 **ALERT level A** = Most likely a serious problem - resolve or explain

1 **ALERT level B** = A potentially serious problem, consider carefully

18 **ALERT level C** = Check. Ensure it is not caused by an omission or oversight

9 **ALERT level G** = General information/check it is not something unexpected

2 ALERT type 1 CIF construction/syntax error, inconsistent or missing data

17 ALERT type 2 Indicator that the structure model may be wrong or deficient

2 ALERT type 3 Indicator that the structure quality may be low

6 ALERT type 4 Improvement, methodology, query or suggestion

1 ALERT type 5 Informative message, check

---

---

It is advisable to attempt to resolve as many as possible of the alerts in all categories. Often the minor alerts point to easily fixed oversights, errors and omissions in your CIF or refinement strategy, so attention to these fine details can be worthwhile. In order to resolve some of the more serious problems it may be necessary to carry out additional measurements or structure refinements. However, the purpose of your study may justify the reported deviations and the more serious of these should normally be commented upon in the discussion or experimental section of a paper or in the "special\_details" fields of the CIF. checkCIF was carefully designed to identify outliers and unusual parameters, but every test has its limitations and alerts that are not important in a particular case may appear. Conversely, the absence of alerts does not guarantee there are no aspects of the results needing attention. It is up to the individual to critically assess their own results and, if necessary, seek expert advice.

### **Publication of your CIF in IUCr journals**

A basic structural check has been run on your CIF. These basic checks will be run on all CIFs submitted for publication in IUCr journals (*Acta Crystallographica*, *Journal of Applied Crystallography*, *Journal of Synchrotron Radiation*); however, if you intend to submit to *Acta Crystallographica Section C* or *E* or *IUCrData*, you should make sure that full publication checks are run on the final version of your CIF prior to submission.

### **Publication of your CIF in other journals**

Please refer to the *Notes for Authors* of the relevant journal for any special instructions relating to CIF submission.

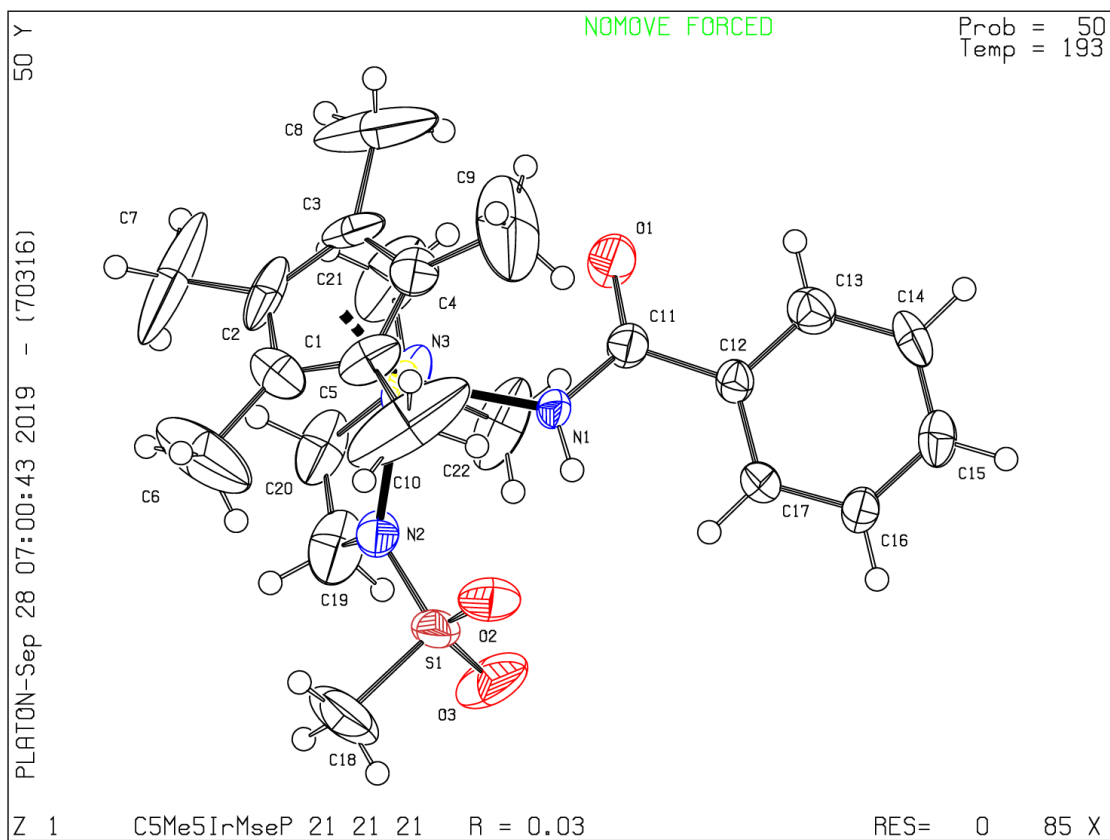

Supplement: s1 [file s1]
